# Supplementary material for: A [V6B20]-based architecture incorporating two types of organic amine ligands: innovative additives for enhancing the proton conductivity of Nafion membrane
Source: Royal Society of Chemistry journal article supplement (doi:10.1039/d4tc01366b), 2024-01-01
Supplement: d4tc01366b1.pdf [file d4tc01366b1.pdf]

## Electronic Supplementary Information

### A [V<sub>6</sub>B<sub>20</sub>]-based architecture incorporating two types of organic amine ligands: innovative additives for enhancing the proton conductivity of Nafion membrane

Xinxin Liu<sup>a</sup>, Linyushan Ma<sup>a</sup>, Lijing Zhou<sup>a</sup>, Biao Guo<sup>\*a</sup> and Zhen Zhao<sup>\*a,b</sup>

<sup>a</sup> Institute of Catalysis for Energy and Environment, College of Chemistry and Chemical Engineering, Shenyang Normal University, Shenyang, 110034, China

<sup>b</sup> State Key Laboratory of Heavy Oil Processing, China University of Petroleum, Beijing, 102249, China

\*Corresponding author: biaoquo14@126.com; zhenzhao@cup.edu.cn

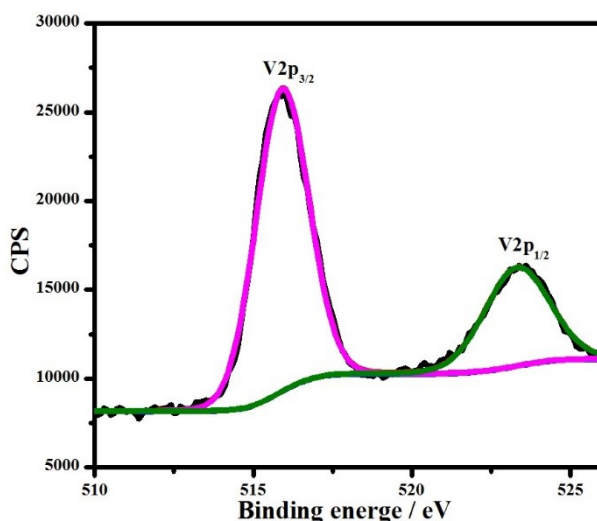

Fig. S1 XPS spectrum of vanadium in VB-1.

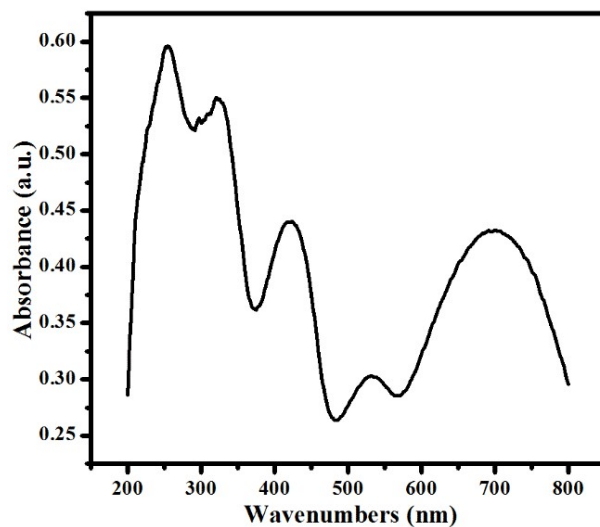

Fig. S2 UV-vis spectrum of VB-1.

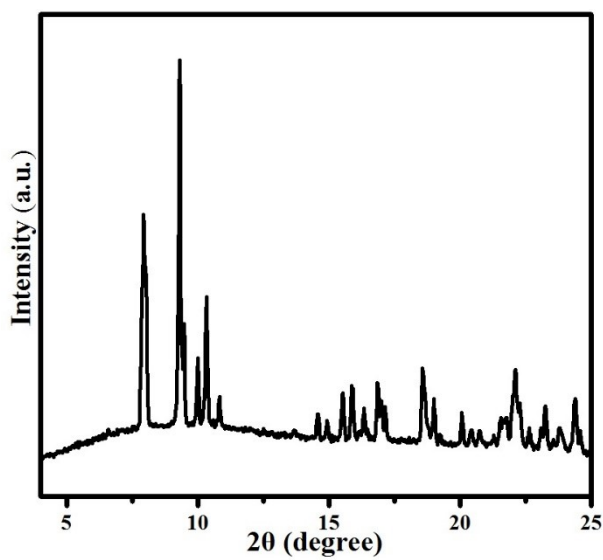

Fig. S3 PXRD pattern of VB-1/Nafion composite with a more limited x-axis range.

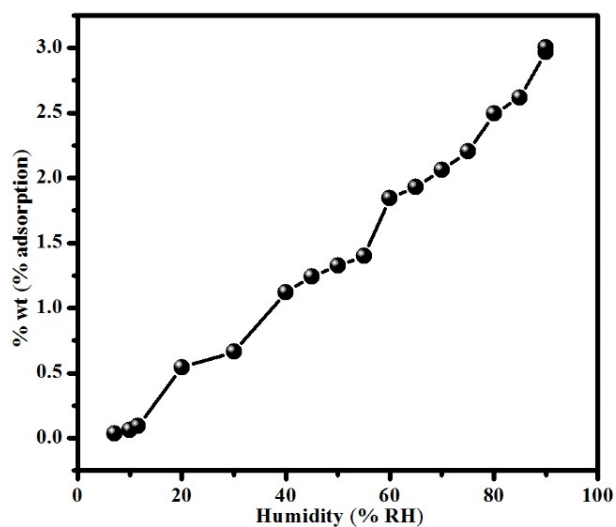

**Fig. S4** The water adsorption isotherm of **VB-1** at 293 K.

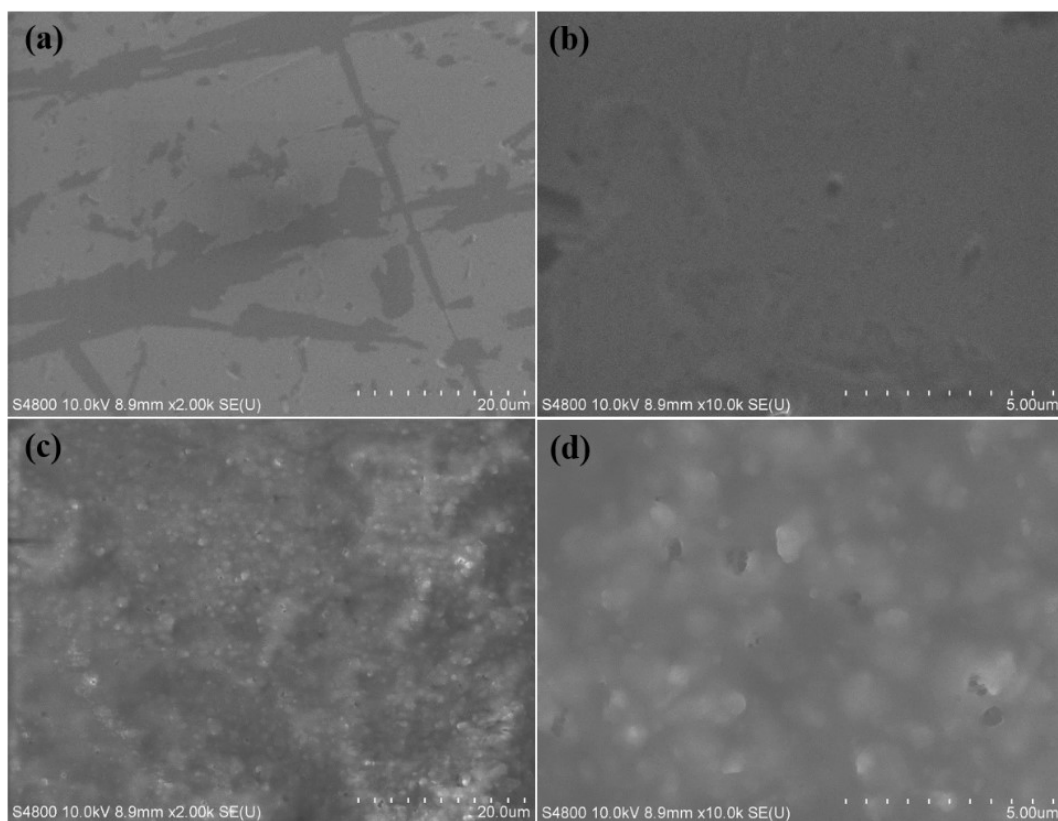

**Fig. S5** SEM images of (a, b) Nafion and (c, d) **VB-1**/Nafion composite membranes.

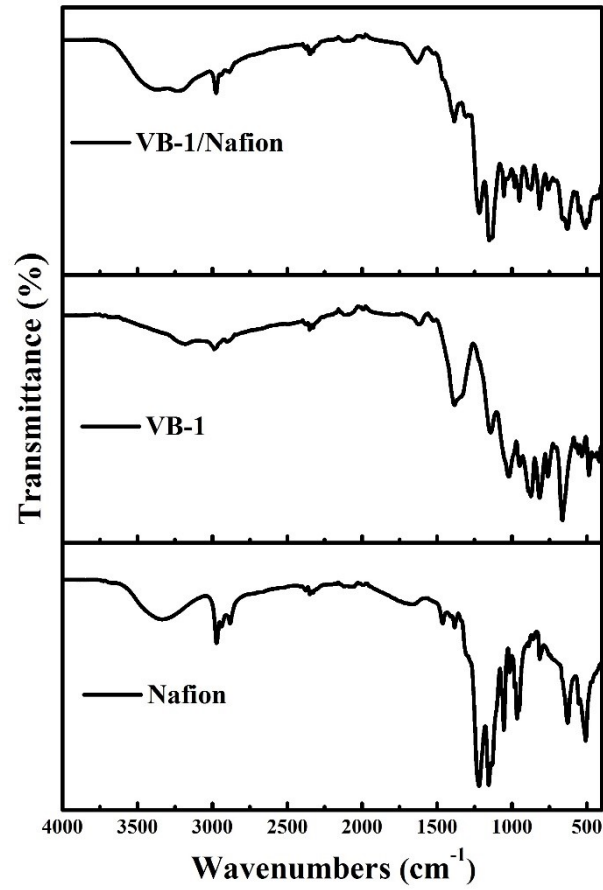

Fig. S6 FT-IR spectra of VB-1, pure Nafion and VB-1/Nafion composite membranes.

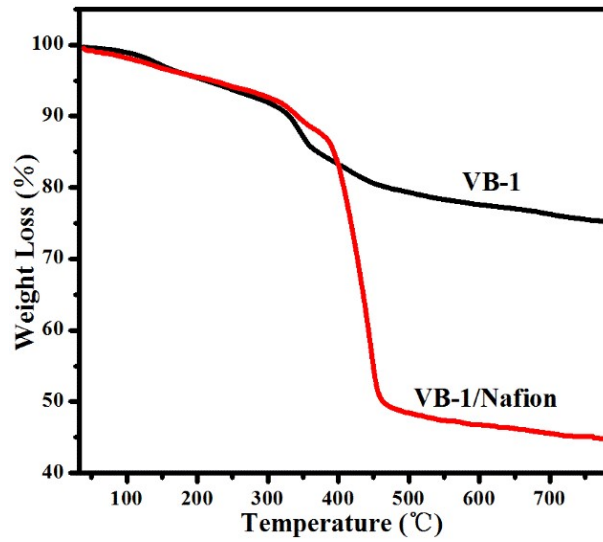

Fig. S7 TG curves of VB-1 and VB-1/Nafion in air.

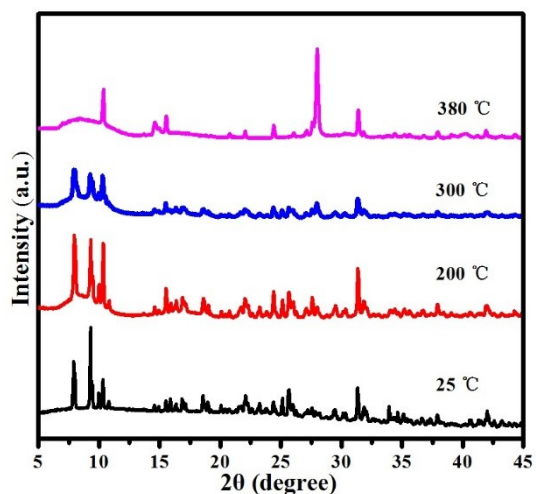

**Fig. S8** PXR D patterns of VB-1/Nafion composite after thermal treatment at 200 °C, 300 °C and 380 °C.

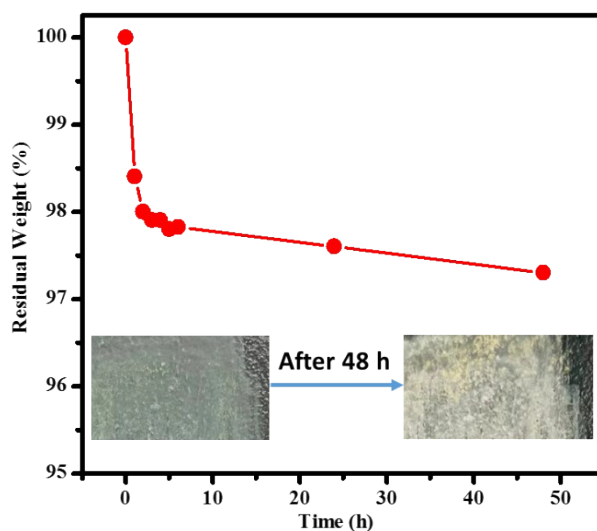

**Fig. S9** Oxidative stability and digital photographs of VB-1/Nafion composite before and after Fenton's test at 60 °C for 48 h.

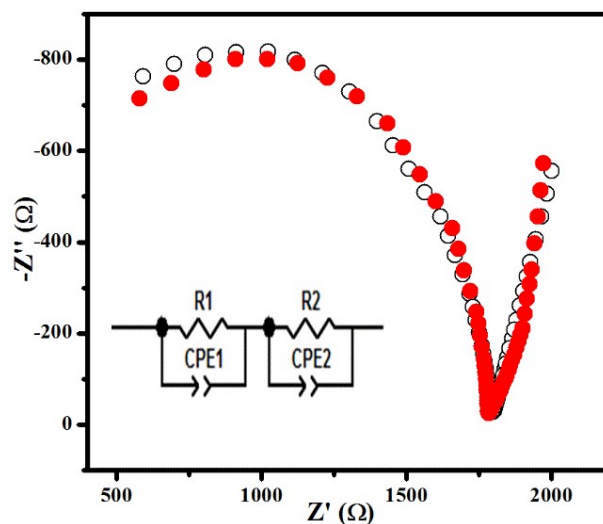

Fig. S10 Equivalent circuits used to fit the impedance data.

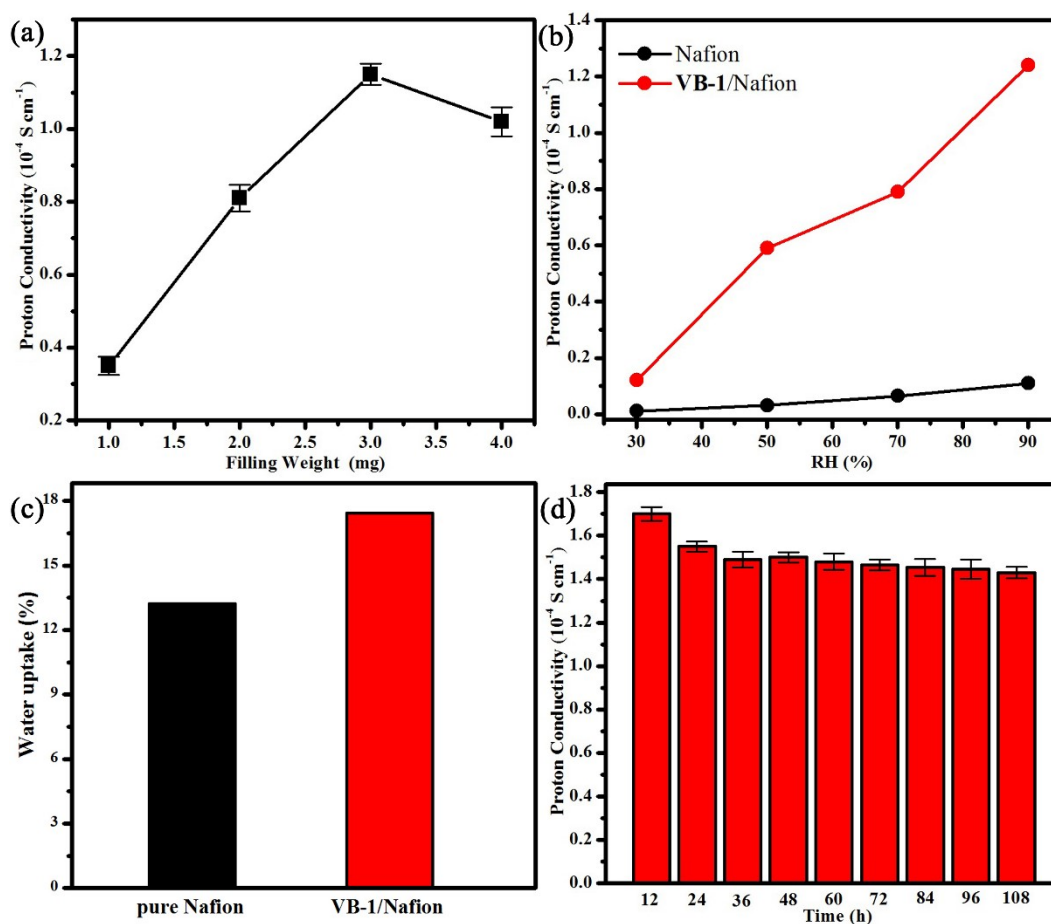

Fig. S11 Proton conductivities of VB-1/Nafion composite membranes investigated under different conditions: (a) varying weight loadings of VB-1 at 293 K, (b) different RHs at 343 K, (d) various time points during water immersion tests at 343 K; (c) the water uptake ratio of pure Nafion and VB-1/Nafion membranes.

**Table S1** Bond lengths [Å] for **VB-1**

|         |            |         |           |
|---------|------------|---------|-----------|
| V1 V2   | 3.0425(15) | O16 B8  | 1.543(8)  |
| O7 B5   | 1.511(8)   | V3 O22  | 1.967(4)  |
| V1 V31  | 3.0547(14) | O16 B10 | 1.480(9)  |
| O7 B10  | 1.475(9)   | V3 O23  | 1.610(5)  |
| V1 O101 | 1.959(4)   | O17 B10 | 1.438(8)  |
| O8 B4   | 1.381(9)   | O1 B1   | 1.371(9)  |
| V1 O19  | 1.959(4)   | O18 B8  | 1.414(8)  |
| O9 B4   | 1.366(10)  | O2 B1   | 1.352(9)  |
| V1 O20  | 1.939(4)   | O18 B9  | 1.436(8)  |
| O9 B5   | 1.468(9)   | O2 B9   | 1.457(8)  |
| V1 O221 | 1.970(5)   | O19 B8  | 1.459(8)  |
| O10 B5  | 1.485(8)   | O3 B1   | 1.374(9)  |
| V1 O25  | 1.620(4)   | O20 B9  | 1.452(8)  |
| O11 B5  | 1.435(9)   | O3 B2   | 1.469(9)  |
| V2 V3   | 3.0477(15) | O21 B2  | 1.459(8)  |
| O11 B6  | 1.427(9)   | O4 B2   | 1.441(9)  |
| V2 O101 | 1.973(5)   | O22 B3  | 1.483(8)  |
| O12 B6  | 1.478(8)   | O4 B3   | 1.411(9)  |
| V2 O121 | 1.956(4)   | N1 C1   | 1.520(10) |
| O13 B6  | 1.470(8)   | O5 B2   | 1.522(9)  |
| V2 O20  | 1.964(4)   | N2 C3   | 1.500(16) |
| O13 B7  | 1.360(10)  | O5 B9   | 1.535(9)  |
| V2 O21  | 1.944(4)   | N3 C4   | 1.491(10) |
| O14 B7  | 1.379(9)   | O5 B10  | 1.484(8)  |
| V2 O24  | 1.604(5)   | N4 C5   | 1.494(10) |
| O15 B7  | 1.358(9)   | O6 B3   | 1.459(9)  |
| V3 O121 | 1.960(4)   | C1 C2   | 1.513(10) |
| O15 B8  | 1.468(8)   | O6 B4   | 1.352(9)  |
| V3 O191 | 1.963(4)   | C2 C3   | 1.476(10) |
| O16 B6  | 1.525(8)   | O7 B3   | 1.538(9)  |
| V3 O21  | 1.957(4)   | C4 C5   | 1.518(10) |

**Table S2** Bond angles [deg] for **VB-1**

|              |            |            |            |
|--------------|------------|------------|------------|
| V2 V1 V31    | 120.42(4)  | C2 C1 N1   | 120.8(17)  |
| V21 O12 V31  | 102.22(19) | O101 V2 V1 | 39.13(12)  |
| O101 V1 V2   | 39.47(13)  | C3 C2 C1   | 122.2(18)  |
| B6 O12 V21   | 125.2(4)   | O101 V2 V3 | 118.03(14) |
| O101 V1 V31  | 117.55(14) | C2 C3 N2   | 120.7(14)  |
| B6 O12 V31   | 129.0(4)   | O121 V2 V1 | 117.03(14) |
| O101 V1 O221 | 91.17(19)  | N3 C4 C5   | 118(3)     |

|              |            |              |            |
|--------------|------------|--------------|------------|
| B7 O13 B6    | 122.1(5)   | O121 V2 V3   | 38.94(13)  |
| O19 V1 V2    | 116.80(13) | N4 C5 C4     | 98.6(8)    |
| B7 O15 B8    | 122.8(6)   | O121 V2 O101 | 90.95(19)  |
| O19 V1 V31   | 38.87(13)  | O1 B1 O3     | 120.2(7)   |
| B6 O16 B8    | 115.5(5)   | O121 V2 O20  | 140.51(19) |
| O19 V1 O101  | 142.60(19) | O2 B1 O1     | 117.2(7)   |
| B10 O16 B6   | 121.7(5)   | O20 V2 V1    | 38.48(13)  |
| O19 V1 O221  | 77.25(18)  | O2 B1 O3     | 122.6(6)   |
| B10 O16 B8   | 122.8(5)   | O20 V2 V3    | 115.94(13) |
| O20 V1 V2    | 39.09(12)  | O3 B2 O5     | 106.9(6)   |
| B8 O18 B9    | 116.6(5)   | O20 V2 O101  | 77.12(17)  |
| O20 V1 V31   | 115.79(13) | O4 B2 O3     | 112.6(6)   |
| V1 O19 V31   | 102.35(19) | O21 V2 V1    | 115.71(13) |
| O20 V1 O101  | 78.05(18)  | O4 B2 O5     | 107.5(5)   |
| B8 O19 V1    | 124.8(4)   | O21 V2 V3    | 38.79(13)  |
| O20 V1 O19   | 89.35(18)  | O4 B2 O21    | 111.2(6)   |
| B8 O19 V31   | 129.6(4)   | O21 V2 O101  | 141.57(19) |
| O20 V1 O221  | 141.88(19) | O21 B2 O3    | 109.9(5)   |
| V1 O20 V2    | 102.43(19) | O21 V2 O121  | 77.38(18)  |
| O221 V1 V2   | 117.96(14) | O21 B2 O5    | 108.6(5)   |
| B9 O20 V1    | 126.2(4)   | O21 V2 O20   | 88.88(18)  |
| O221 V1 V31  | 39.07(12)  | O4 B3 O6     | 111.2(6)   |
| B9 O20 V2    | 129.2(4)   | O24 V2 V1    | 119.98(19) |
| O25 V1 V2    | 116.98(17) | O4 B3 O7     | 108.9(5)   |
| V2 O21 V3    | 102.73(19) | O24 V2 V3    | 119.34(18) |
| O25 V1 V31   | 122.60(17) | O4 B3 O22    | 112.5(5)   |
| B2 O21 V2    | 128.3(4)   | O24 V2 O101  | 108.3(2)   |
| O25 V1 O101  | 106.5(2)   | O6 B3 O7     | 107.8(5)   |
| B2 O21 V3    | 126.7(4)   | O24 V2 O121  | 108.9(2)   |
| O25 V1 O19   | 110.8(2)   | O6 B3 O22    | 108.9(5)   |
| V3 O22 V11   | 101.80(19) | O24 V2 O20   | 110.6(2)   |
| O25 V1 O20   | 107.5(2)   | O22 B3 O7    | 107.3(5)   |
| B3 O22 V11   | 128.5(4)   | O24 V2 O21   | 110.2(2)   |
| O25 V1 O221  | 110.6(2)   | O6 B4 O8     | 119.4(7)   |
| B3 O22 V3    | 124.2(4)   | V2 V3 V11    | 118.90(4)  |
| V1 V2 V3     | 120.68(4)  | O6 B4 O9     | 124.3(6)   |
| O9 B4 O8     | 116.3(7)   | O121 V3 V11  | 115.57(14) |
| O121 V3 V2   | 38.85(13)  | O2 B9 O5     | 107.9(5)   |
| O9 B5 O7     | 108.4(5)   | B2 O5 B9     | 114.7(5)   |
| O121 V3 O191 | 89.29(19)  | O18 B9 O2    | 109.8(5)   |
| O9 B5 O10    | 109.7(5)   | B10 O5 B2    | 122.9(5)   |
| O121 V3 O22  | 141.64(19) | O18 B9 O5    | 107.9(5)   |
| O10 B5 O7    | 107.2(5)   | B10 O5 B9    | 122.4(5)   |
| O191 V3 V11  | 38.78(12)  | O18 B9 O20   | 113.0(6)   |



|             |            |             |            |
|-------------|------------|-------------|------------|
| O11 B5 O7   | 109.3(5)   | B4 O6 B3    | 121.9(6)   |
| O191 V3 V2  | 115.52(13) | O20 B9 O2   | 110.5(5)   |
| O11 B5 O9   | 110.3(5)   | B5 O7 B3    | 116.5(5)   |
| O191 V3 O22 | 77.22(17)  | O20 B9 O5   | 107.5(5)   |
| O11 B5 O10  | 111.8(6)   | B10 O7 B3   | 121.7(5)   |
| O21 V3 V11  | 114.72(13) | O7 B10 O5   | 107.8(5)   |
| O11 B6 O12  | 112.5(5)   | B10 O7 B5   | 121.3(5)   |
| O21 V3 V2   | 38.48(13)  | O7 B10 O16  | 108.2(5)   |
| O11 B6 O13  | 111.5(5)   | B4 O9 B5    | 120.9(5)   |
| O21 V3 O121 | 76.98(18)  | O16 B10 O5  | 107.9(5)   |
| O11 B6 O16  | 108.3(5)   | V11 O10 V21 | 101.39(19) |
| O21 V3 O191 | 138.92(19) | O17 B10 O5  | 110.1(6)   |
| O12 B6 O16  | 107.6(5)   | B5 O10 V11  | 128.6(4)   |
| O21 V3 O22  | 89.87(18)  | O17 B10 O7  | 111.2(6)   |
| O13 B6 O12  | 108.6(5)   | B5 O10 V21  | 124.9(4)   |
| O22 V3 V11  | 39.13(13)  | O17 B10 O16 | 111.5(5)   |
| O13 B6 O16  | 108.1(5)   | B6 O11 B5   | 117.4(5)   |
| O22 V3 V2   | 117.07(14) | O23 V3 O22  | 109.1(2)   |
| O13 B7 O14  | 118.1(6)   | O18 B8 O19  | 113.8(5)   |
| O23 V3 V11  | 121.58(19) | B1 O2 B9    | 121.6(6)   |
| O15 B7 O13  | 123.0(6)   | O19 B8 O15  | 110.7(5)   |
| O23 V3 V2   | 119.52(19) | B1 O3 B2    | 122.4(6)   |
| O15 B7 O14  | 118.9(7)   | O19 B8 O16  | 107.3(5)   |
| O23 V3 O121 | 109.3(2)   | B3 O4 B2    | 117.8(5)   |
| O15 B8 O16  | 106.6(5)   | O23 V3 O21  | 110.2(2)   |
| O23 V3 O191 | 110.9(2)   | O18 B8 O16  | 107.8(5)   |
| O18 B8 O15  | 110.4(5)   |             |            |

Symmetry transformations used to generate equivalent atoms: <sup>1</sup>2-X,1-Y,2-Z
